# Supplementary material
Source: Frontiers journal article supplement (https://www.frontiersin.org/articles/267395)
Supplement: Image_3.PDF [file Image_3.PDF]

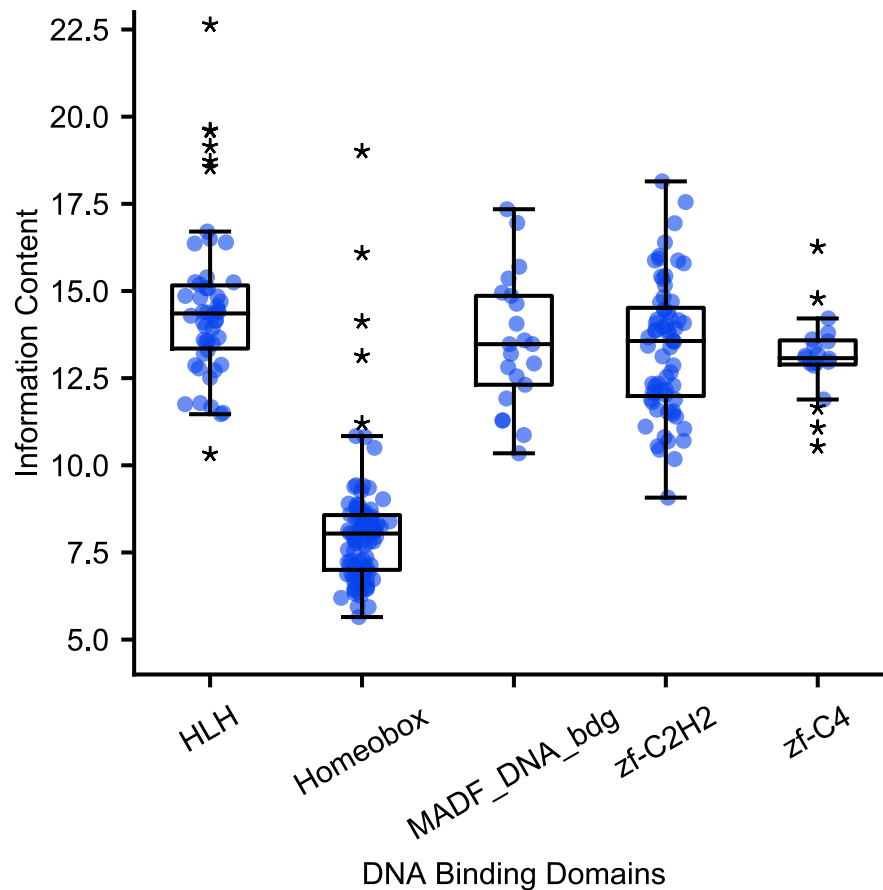

**Supplementary Figure 3. The information content of homeobox proteins is generally lower than that of transcription factors with other common DNA-binding domains.** We show boxplots of the information content of the TFs by DNA-binding domain, with boxes indicating the lower and upper quartiles and the line within the box indicating the median. Whiskers extend to  $1.5 \times \text{IQR}$  plus or minus the upper and lower quartile, respectively. The stars indicate outliers that fall outside the whiskers. Only those DNA-binding domains that are represented by more than 10 TFs in our sample have been included.
